27. Kanjilal S, Gregg EW, Cheng YJ, Zhang P, Nelson DE, Mensah G, Beckles GL. Socioeconomic status and trends in disparities in 4 major risk factors for cardiovascular disease among US adults, 1971–2002. *Arch Intern Med* 2006;**166**: 2348–2355.
28. Ernsten L, Strand BH, Nilsen SM, Espnes GA, Krokstad S. Trends in absolute and relative educational inequalities in four modifiable ischaemic heart disease risk factors: repeated cross-sectional surveys from the Nord-Trøndelag Health Study (HUNT) 1984–2008. *BMC Public Health* 2012;**12**:266-2458-12-266.
29. Eggen AE, Mathiesen EB, Wilsgaard T, Jacobsen BK, Njolstad I. Trends in cardiovascular risk factors across levels of education in a general population: is the educational gap increasing? The Tromso study 1994-2008. *J Epidemiol Community Health* 2014;**68**:712–719.
30. Paalanen L, Prattala R, Laatikainen T. Contribution of education level and dairy fat sources to serum cholesterol in Russian and Finnish Karelia: results from four cross-sectional risk factor surveys in 1992–2007. *BMC Public Health* 2012;**12**: 910-2458-12-910.

## CARDIOVASCULAR FLASHLIGHT

doi:10.1093/eurheartj/ehw090

Online publish-ahead-of-print 16 March 2016

# Chinese herbal drug natural indigo may cause pulmonary artery hypertension

Mayu Nishio\*, Keiji Hirooka, and Yasuji Doi

Saiseikai Senri Hospital, Suita, Osaka, Japan

\* Corresponding author. Tel: +81668710121, Fax: +81668710130, Email: [nishiomayu@gmail.com](mailto:nishiomayu@gmail.com)

A 45-year-old woman was admitted due to increasing dyspnoea, chest oppression, and leg oedema in December 2015. She had a 5-year history of ulcerative colitis (UC) and had been taking the herbal medicine natural indigo (NI) at 2 g/day for 6 months. No abnormalities had been detected at a medical check-up 3 months before admission. On admission, transthoracic echocardiography revealed typical systolic flattening of the interventricular septum (Panel A) with a dilated right ventricle and severe tricuspid regurgitation (Panel B), indicating severe pulmonary artery hypertension (PAH). Electrocardiogram-gated contrast-enhanced computed tomography revealed a dilated right ventricle without pulmonary embolism (Panels C and D). No cardiovascular anomaly or arteriovenous shunt was detected on transoesophageal echocardiography. After diuretic treatment for 6 days, catheterization revealed PAH (58/25 mmHg; mean, 36 mmHg) and high PA resistance ( $689 \text{ dyn s cm}^{-5}$ ) with normal pulmonary capillary wedge and left ventricular end-diastolic pressures (5 mmHg, respectively). From the physical examinations and laboratory data, collagen diseases were considered unlikely. The lymphocyte transformation test, which indicates drug allergy, showed a positive reaction for NI, suggesting NI as a possible cause of PAH. Although symptoms were improved after diuretic therapy, estimated PA systolic pressure after discontinuing NI for 1 month remained high (58 mmHg). Careful observation and additional medication are needed.

Natural indigo, an unapproved Chinese herbal drug used for UC, has been reported as effective against intractable UC, and clinical trials are ongoing. Although no causative relationship between NI and PAH has been established, clinicians should recognize a potential association between NI and PAH.

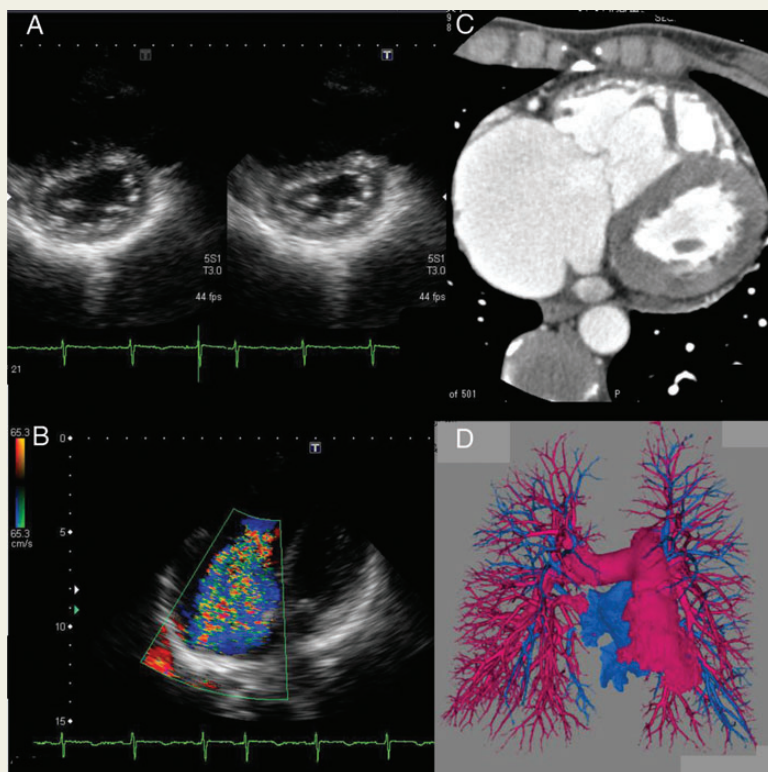

Source: http://academic.oup.com/eurheartj/article-pdf/37/25/1992/6734016/ehw090.pdf
